# Supplementary material
Source: Springer Nature journal article supplement (http://www.springermedizin.de/resource/supplementary/12876_2010_519_MOESM5_ESM.pdf/9436898)

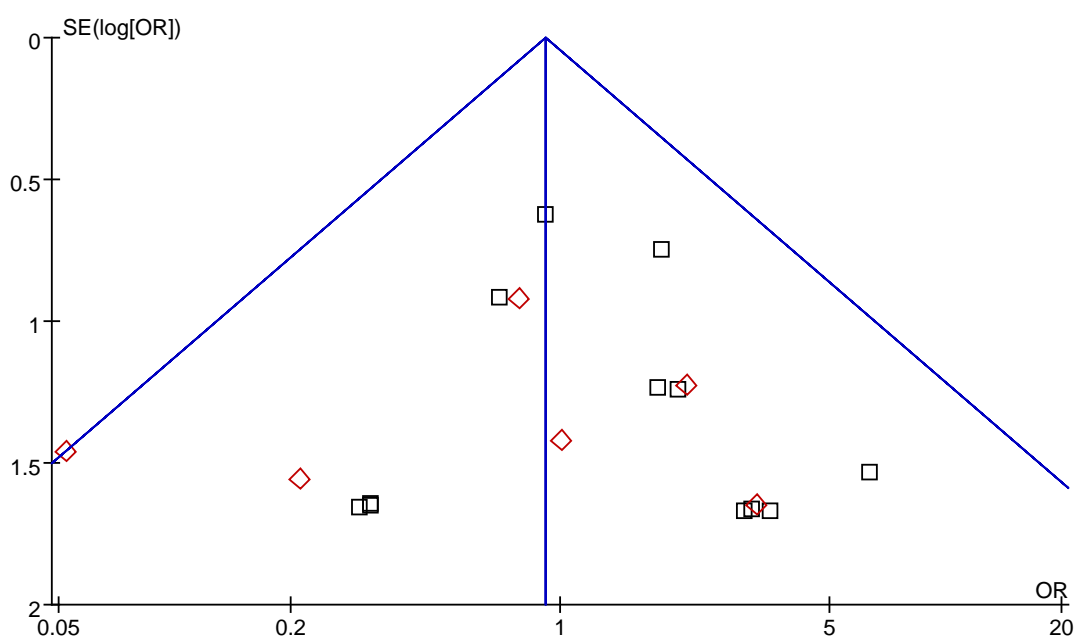

**Subgroups**

□ pre 2000

◇ post 2000

Supplement: MOESM5 [file 9436898]
